# Supplementary material for: A Distinct Class of Antibodies May Be an Indicator of Gray Matter Autoimmunity in Early and Established Relapsing Remitting Multiple Sclerosis Patients
Source: PubMed Central journal article supplement (PMC4710131; doi:10.1177/1759091415609613), 2015-10-19
Supplement: Supplemental_Tables_613.pdf [file Supplemental_Tables_613.pdf]

**Supplemental Table 1. Patient, Gene, and Staining Overview of the 12 rhAbs used for DAB and IFC**

| Patient # | Diagnosis         | rhAb  | V <sub>H</sub> ; J <sub>H</sub> <sup>1</sup> | V <sub>κ</sub> ; J <sub>κ</sub> <sup>2</sup> | Clone | # AGS <sup>3</sup> | V <sub>H</sub> J <sub>H</sub> SHM <sup>4</sup> | Mouse Liver <sup>5</sup> | Mouse Stroke/ EAE Brain <sup>6</sup> | Human Fixed/ Unfixed Brain <sup>7</sup> | NeuN <sup>8</sup> | GFAP <sup>9</sup> |
|-----------|-------------------|-------|----------------------------------------------|----------------------------------------------|-------|--------------------|------------------------------------------------|--------------------------|--------------------------------------|-----------------------------------------|-------------------|-------------------|
| 1         | CDMS              | AJL02 | 4-31; 4                                      | 1-39; 2                                      | no    | 2                  | 8.96%                                          | -                        | +/+                                  | +/+                                     | +                 | +                 |
|           |                   | AJL03 | 4-39; 1                                      | 1-33; 2                                      | no    | 2                  | 7.96%                                          | -                        | +/+                                  | +/+                                     | +                 | -                 |
| 2         | ON <sub>CIS</sub> | AJL10 | 4-04; 6                                      | 2-28; 5                                      | no    | 4                  | 12.63%                                         | +                        | +/+                                  | +/+                                     | +                 | -                 |
|           |                   | WR12  | 4-30; 4                                      | 2-28; 4                                      | yes   | 2                  | 12.44%                                         | -                        | +/+                                  | +/+                                     | -                 | +                 |
|           |                   | WR13  | 4-30; 4                                      | 2-28; 2                                      | yes   | 2                  | 11.94%                                         | -                        | +/+                                  | +/+                                     | -                 | +                 |
| 3         | ON <sub>CIS</sub> | AJL07 | 4-59; 4                                      | 1-13; 2                                      | yes   | 3                  | 9.23%                                          | -                        | +/+                                  | +/+                                     | +                 | +                 |
| 4         | TM <sub>CIS</sub> | AJL01 | 4-34; 3                                      | 3-20; 5                                      | yes   | 3                  | 11.28%                                         | -                        | +/+                                  | +/+                                     | -                 | +                 |
|           |                   | WR10  | 4-04; 6                                      | 3-20; 5                                      | yes   | 2                  | 4.55%                                          | -                        | +/+                                  | +/+                                     | +                 | +                 |
| 5         | TM <sub>CIS</sub> | AJL15 | 4-39; 5                                      | 2-29; 2                                      | yes   | 4                  | 7.46%                                          | -                        | +/+                                  | +/+                                     | +                 | -                 |
| 6         | TM <sub>CIS</sub> | AJL19 | 4-34; 3                                      | 3-20; 2                                      | yes   | 3                  | 8.21%                                          | -                        | +/+                                  | +/+                                     | +                 | +                 |
| 11        | TM <sub>NMO</sub> | R1    | 4-61; 4                                      | 1-39; 2                                      | no    | 4                  | 10.95%                                         | -                        | -/-                                  | n/a                                     | -                 | -                 |
|           |                   | R2    | 4-04; 1                                      | 3-11; 5                                      | no    | 2                  | 7.58%                                          | -                        | -/-                                  | n/a                                     | -                 | -                 |

*Abbreviations:* CDMS: clinically definite multiple sclerosis, ON<sub>CIS</sub>: clinically isolated syndrome- optic neuritis, TM<sub>CIS</sub>: clinically isolated syndrome-transverse myelitis, NMO: neuromyelitis optica, rhAb: recombinant human antibody, V<sub>H</sub>: variable heavy chain, J<sub>H</sub>: variable heavy chain J segment, V<sub>κ</sub>: variable kappa chain, J<sub>κ</sub>: variable kappa chain J segment, AGS: antibody gene signature, V<sub>H</sub>J<sub>H</sub> MF: variable heavy chain rearrangement mutation frequency, EAE: experimental autoimmune encephalomyelitis, NeuN: neuronal nuclei, GFAP: glial fibrillary acid protein

<sup>1</sup> Variable heavy and J segment usage by the rhAb.

<sup>2</sup> Variable kappa and J segment usage by the rhAb.

<sup>3</sup> Number of mutated AGS codons (6 total possible) in the V<sub>H</sub>4 gene of the rhAb.

<sup>4</sup> Somatic hypermutation frequency for the heavy chain rearrangement of the rhAb.

<sup>5</sup> Positive (+) or negative (-) staining as determined by DAB staining on mouse liver tissue.

<sup>6</sup> Positive (+) or negative (-) staining as determined by DAB staining on mouse post-stroke brain or EAE tissue.

<sup>7</sup> Positive (+) or negative (-) staining as determined by DAB staining on human brain fixed with 4% paraformaldehyde or unfixed frozen brain. Positive (+) or negative (-) colocalization as determined by the mouse brain tissue IFC experiments.

**Supplemental Table 2. Patient, Gene, and Staining Overview of the 22 rhAbs Used Only for Mouse Brain Tissue DAB.**

| Patient # | Diagnosis         | rhAb  | V <sub>H</sub> ; J <sub>H</sub> <sup>1</sup> | V <sub>κ</sub> ; J <sub>κ</sub> <sup>2</sup> | Clone | # AGS <sup>3</sup> | V <sub>H</sub> J <sub>H</sub> SHM <sup>4</sup> | Mouse Stroke Brain <sup>5</sup> |
|-----------|-------------------|-------|----------------------------------------------|----------------------------------------------|-------|--------------------|------------------------------------------------|---------------------------------|
| 2         | ON <sub>CIS</sub> | AJL11 | 4-39; 5                                      | 3-20; 2                                      | no    | 3                  | 8.46%                                          | +                               |
| 3         | ON <sub>CIS</sub> | AJL06 | 4-30; 4                                      | 1-33; 2                                      | no    | 3                  | 13.93%                                         | +                               |
|           |                   | AJL08 | 4-0b; 4                                      | 1-5; 2                                       | yes   | 3                  | 2.53%                                          | +                               |
|           |                   | AJL09 | 4-59; 5                                      | 1-13; 5                                      | yes   | 2                  | 7.18%                                          | +                               |
|           |                   | AJL13 | 4-59; 4                                      | 2-30; 5                                      | yes   | 3                  | 9.23%                                          | +                               |
| 4         | TM <sub>CIS</sub> | WR11  | 4-04; 6                                      | 3-11; 4                                      | yes   | 2                  | 4.55%                                          | -                               |
| 5         | TM <sub>CIS</sub> | AJL14 | 4-61; 6                                      | 4-1; 2                                       | no    | 3                  | 10.95%                                         | +                               |
|           |                   | AJL16 | 4-39; 5                                      | 1-33; 5                                      | yes   | 3                  | 5.97%                                          | +                               |
| 6         | TM <sub>CIS</sub> | AJL18 | 4-31; 5                                      | 1-39; 1                                      | yes   | 5                  | 7.96%                                          | +                               |
|           |                   | AJL20 | 4-39; 4                                      | 1-27; 4                                      | no    | 3                  | 9.95%                                          | +                               |
| 7         | CDMS              | WR01  | 4-59; 6                                      | 3-20; 2                                      | yes   | 2                  | 10.26%                                         | -                               |
|           |                   | WR02  | 4-30; 6                                      | 3-20; 2                                      | yes   | 2                  | 8.96%                                          | +                               |
| 8         | CDMS              | WR03  | 4-04; 3                                      | 3-20; 1                                      | no    | 3                  | 5.56%                                          | +                               |
|           |                   | WR04  | 4-39; 4                                      | 3-15; 2                                      | no    | 3                  | 9.45%                                          | +                               |
|           |                   | WR05  | 4-61; 1                                      | 1-5; 4                                       | no    | 4                  | 12.44%                                         | +                               |
|           |                   | WR06  | 4-39; 3                                      | 1-5; 3                                       | no    | 3                  | 14.93%                                         | +                               |
| 9         | CDMS              | WR07  | 4-39; 4                                      | 3-20; 1                                      | no    | 4                  | 6.47%                                          | +                               |
| 10        | ON <sub>CIS</sub> | AJL04 | 4-59; 5                                      | 1-16; 5                                      | yes   | 3                  | 10.26%                                         | +                               |
|           |                   | AJL05 | 4-39; 4                                      | 1-16; 5                                      | yes   | 4                  | 8.46%                                          | +                               |
|           |                   | AJL12 | 4-39; 5                                      | 3-20; 1                                      | no    | 3                  | 8.46%                                          | +                               |
|           |                   | WR08  | 4-31; 4                                      | 2-30; 5                                      | yes   | 2                  | 7.96%                                          | +                               |
|           |                   | WR09  | 4-31; 4                                      | 3-20; 2                                      | yes   | 2                  | 7.96%                                          | +                               |

*Abbreviations:* CDMS: clinically definite multiple sclerosis, ON<sub>CIS</sub>: clinically isolated syndrome- optic neuritis, TM<sub>CIS</sub>: clinically isolated syndrome- transverse myelitis, rhAb: recombinant human antibody, V<sub>H</sub>: variable heavy chain, J<sub>H</sub>: variable heavy chain J segment, V<sub>κ</sub>: variable kappa chain, J<sub>κ</sub>: variable kappa chain J segment, AGS: antibody gene signature, V<sub>H</sub>J<sub>H</sub> MF: variable heavy chain rearrangement mutation frequency

<sup>1</sup> Variable heavy and J segment usage by the rhAb.

<sup>2</sup> Variable kappa and J segment usage by the rhAb.

<sup>3</sup> Number of mutated AGS codons (6 total possible) in the V<sub>H</sub>4 gene of the rhAb.

<sup>4</sup> Somatic hypermutation frequency for the heavy chain rearrangement of the rhAb.

<sup>5</sup> Positive (+) or negative (-) staining as determined by DAB staining on mouse post-stroke brain tissue.
